# Supplementary material for: Identification of circular RNAs regulating cardiomyocyte proliferation in neonatal pig hearts
Source: PubMed Central journal article supplement (PMC11383601; doi:10.1172/jci.insight.175625), 2024-06-25
Supplement: jciinsight-9-175625-s028.pdf [file jciinsight-9-175625-s028.pdf]

1 **Supplemental information**

2 **Identification of Circular RNAs Regulating Cardiomyocyte Proliferation in**

3 **Neonatal Pig Hearts**

4 Ling Tang, Verah Nyarige, Pengsheng Li, Junwen Wang, Wuqiang Zhu

5

6 **List of Supplemental Items**

- 7 • Supplemental Figures 1-10
- 8 • Supplemental Legends 1-10
- 9 • Supplemental Tables 1-11

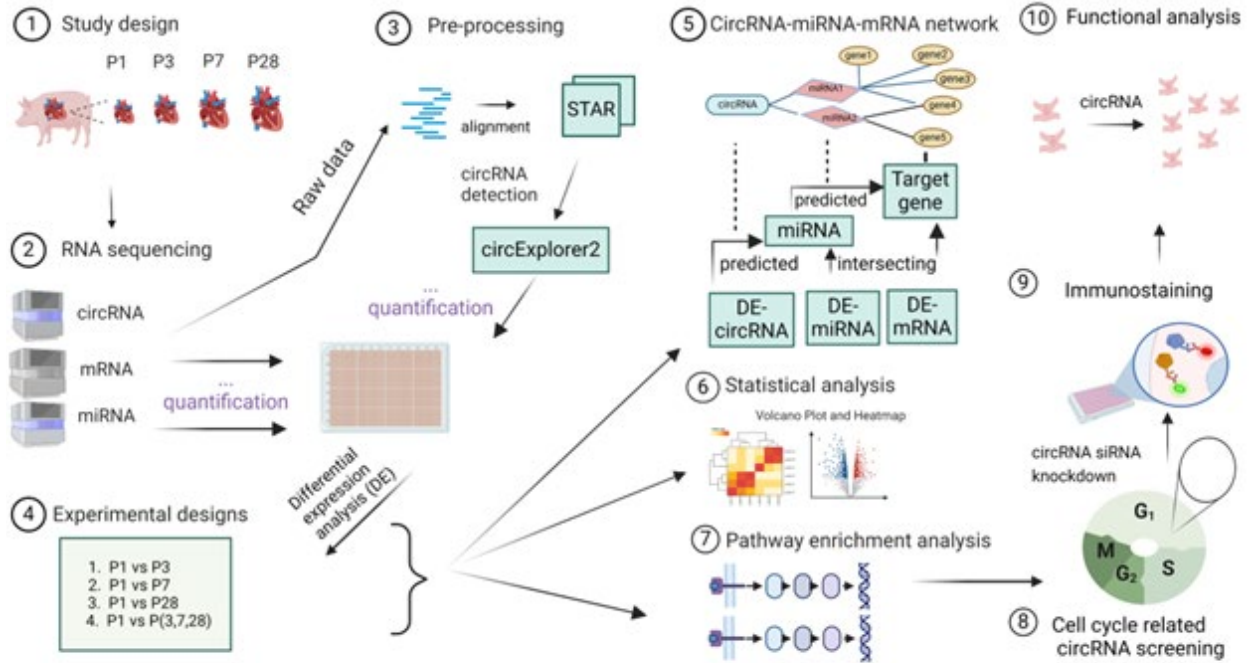

1

2 **Supplemental Figure 1. Diagram illustrating the experimental design.**

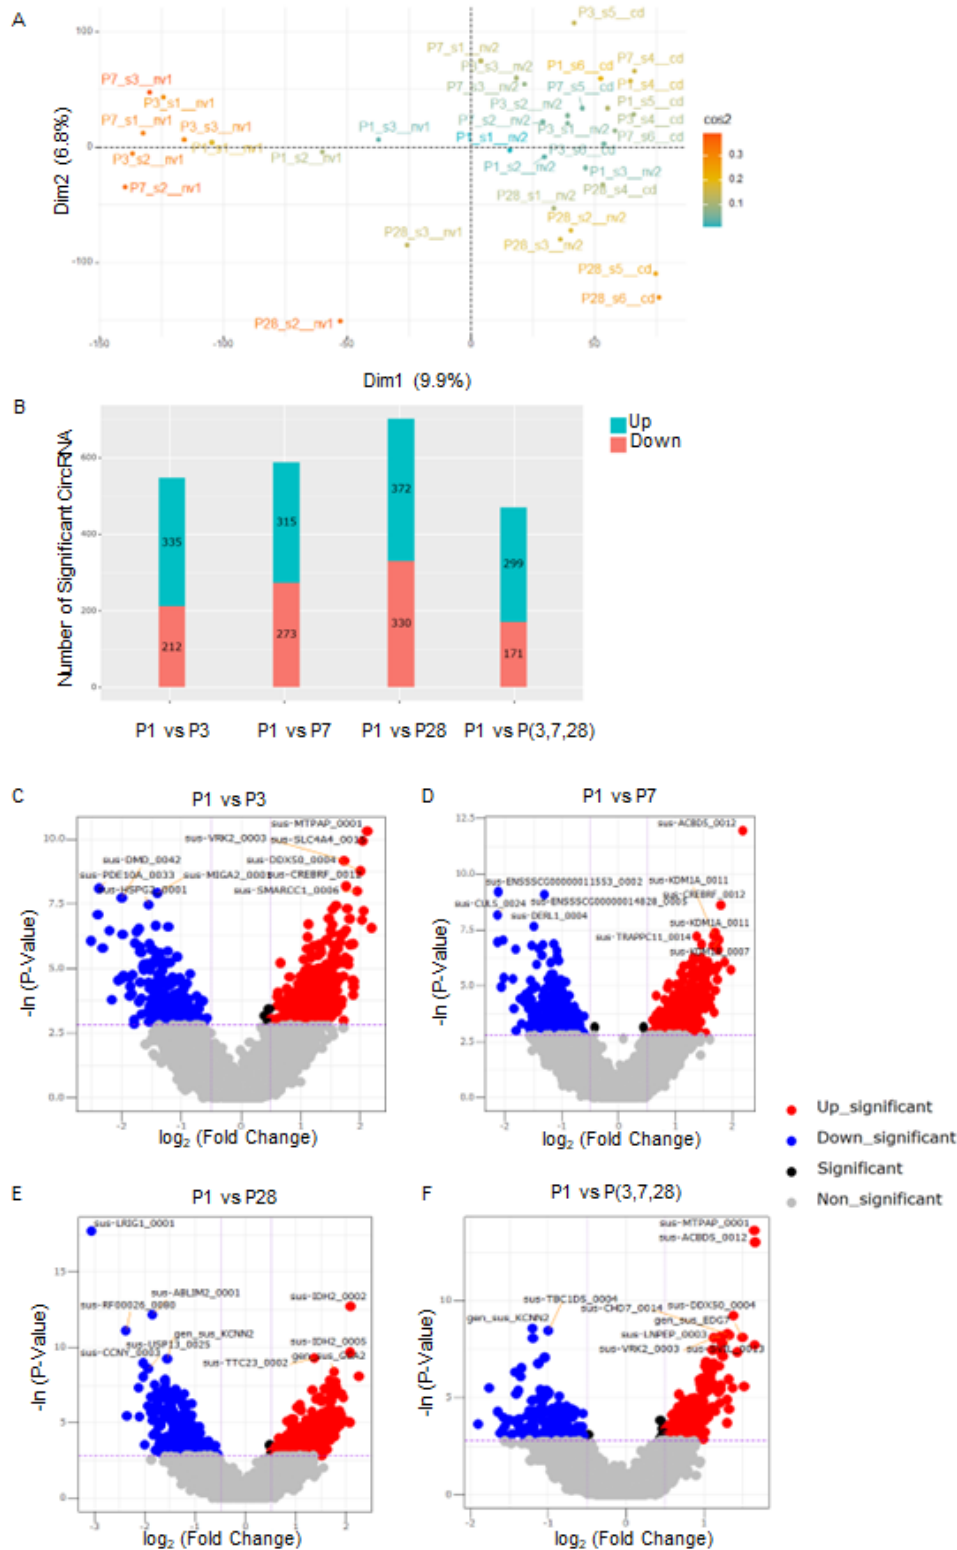

1

2 **Supplemental Figure 2. Differentially expressed circRNAs in neonatal pig hearts.**

3 **(A)** Principal Component Analysis (PCA) visualization of batch-corrected circRNA data

1 from 36 circRNA samples obtained from 24 pig hearts sequenced by CD Genomics Inc.  
2 (“cd”), and Novogene Inc. (“nv1” and “nv2”). **(B)** Barplot showing the counts of significantly  
3 differentially expressed circRNAs. circRNAs with a  $\log_2FC > 0.5$  and p value  $< 0.05$  were  
4 classified as significantly upregulated (in orange) while circRNAs with a  $\log_2FC < -0.5$  and  
5 p value  $< 0.05$  were classified as significantly downregulated (in teal). **(C-F)** Volcano plot  
6 visualizing differential expression analysis results from various comparisons including P1  
7 versus P3 **(C)**, P1 versus P7 **(D)**, P1 versus P28 **(E)**, and P1 versus P3, P7 and P28 **(F)**.  
8 circRNAs were categorized as significantly upregulated if they had a p value  $< 0.05$  and  
9  $\log_2FC > 0.5$  (Up\_significant in red), significantly downregulated if they had a p value  $<$   
10  $0.05$  and  $\log_2FC < -0.5$  (Down\_significant in blue), significant but neither upregulated nor  
11 downregulated if the p value  $< 0.05$  but  $\log_2FC < 0.05$  (in dark), otherwise nonsignificant  
12 (in grey).  
13

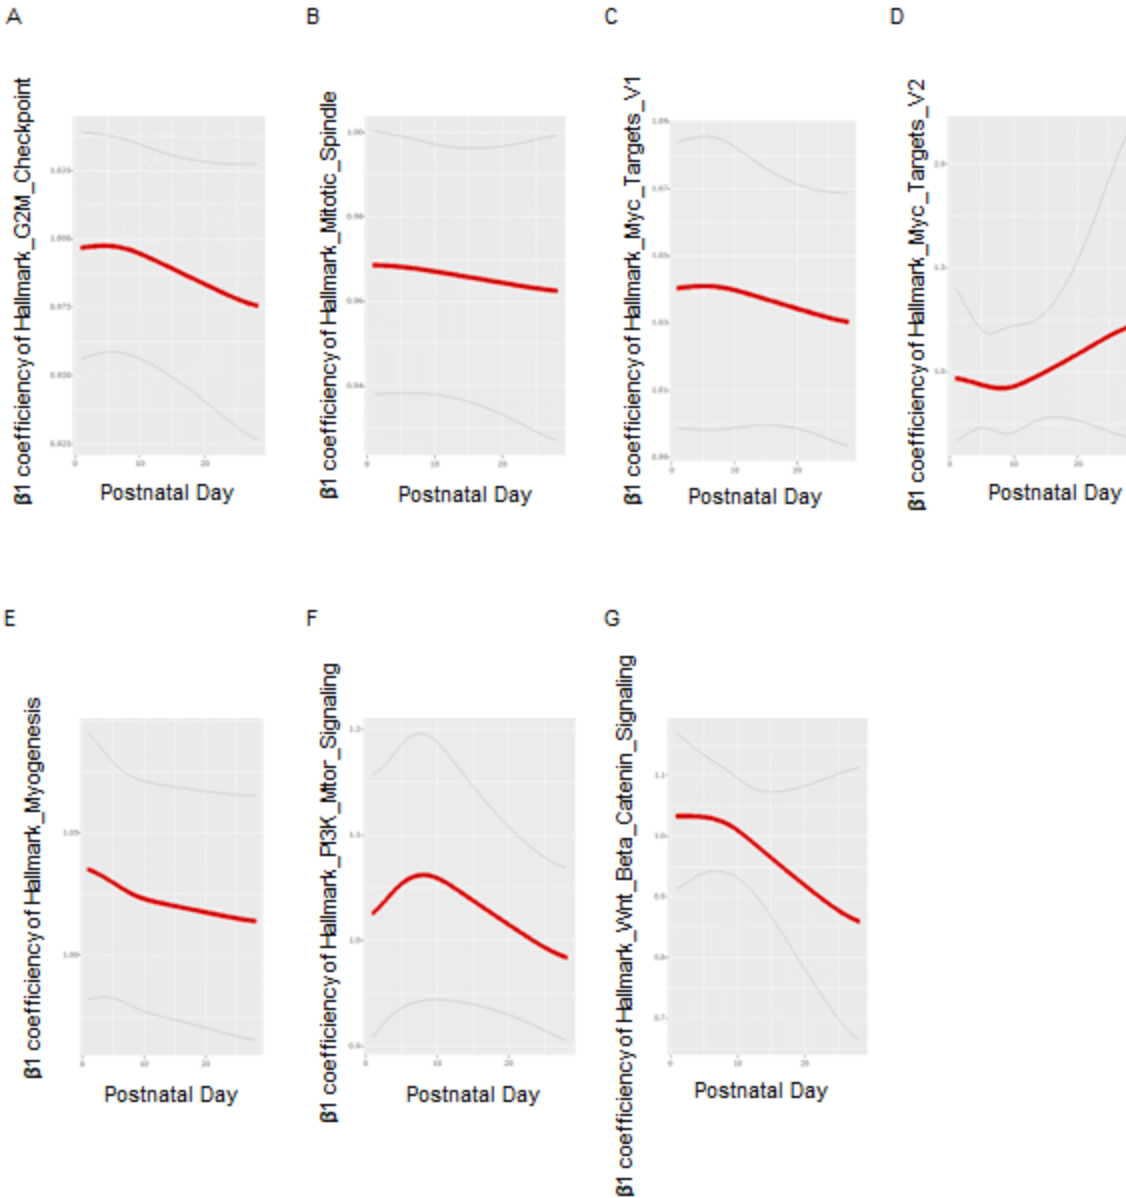

1  
2  
3  
4  
5  
6  
7

**Supplemental Figure 3. Time-varying effect modeling (TVEM) of cell cycle regulating circRNAs. (A-G)** Visualization of the changes in the  $\beta_1$  coefficient across different postnatal periods. Significant variation in the  $\beta_1$  coefficients over time in core cell cycle related pathways such as G2M checkpoint **(A)**, mitotic spindle **(B)**, Myc-targets **(C-D)**, myogenesis **(E)**, PI3K-Akt-mTOR signaling **(F)**, and Wnt-beta catenin signaling **(G)**.

A

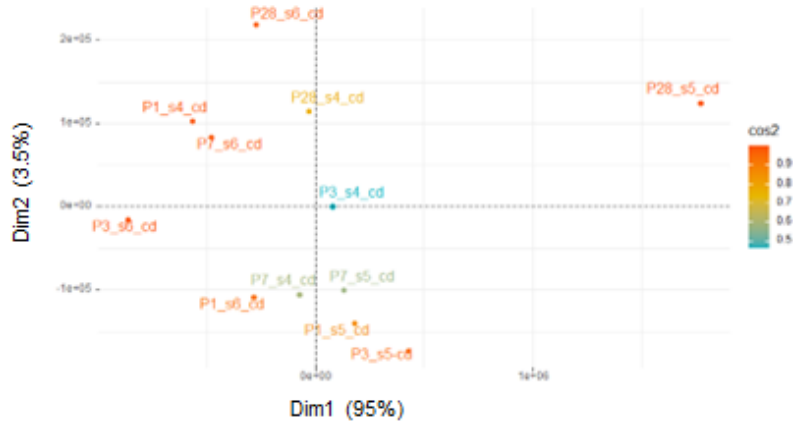

B

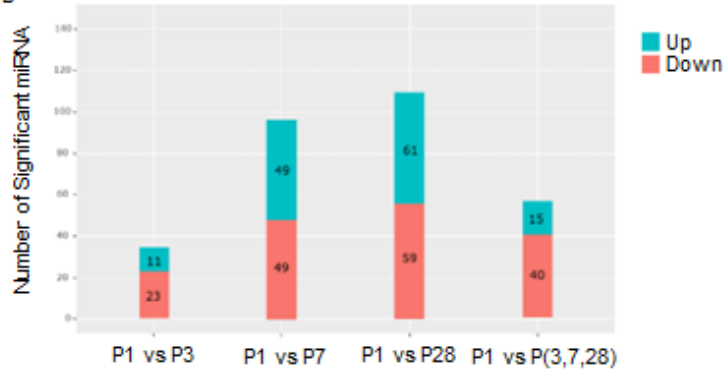

C

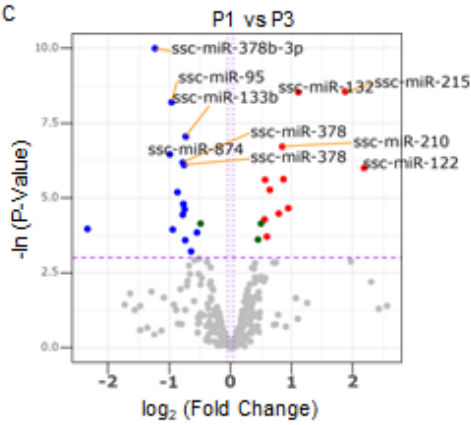

D

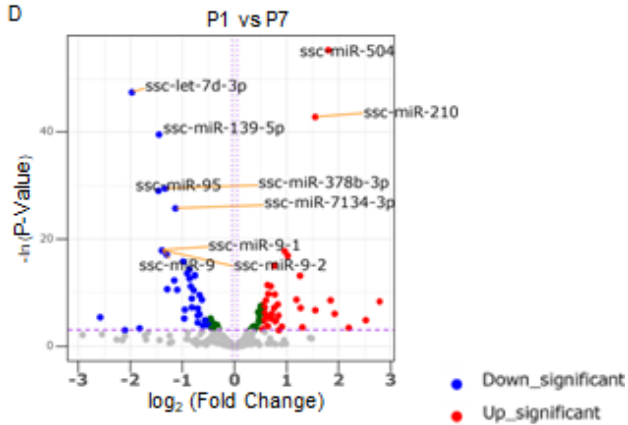

E

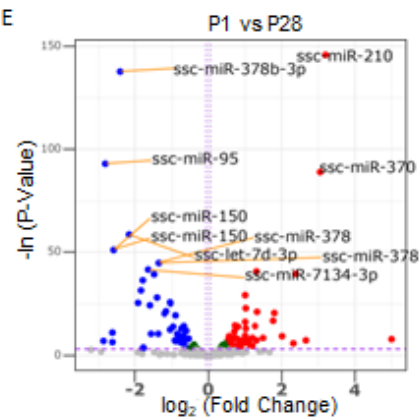

F

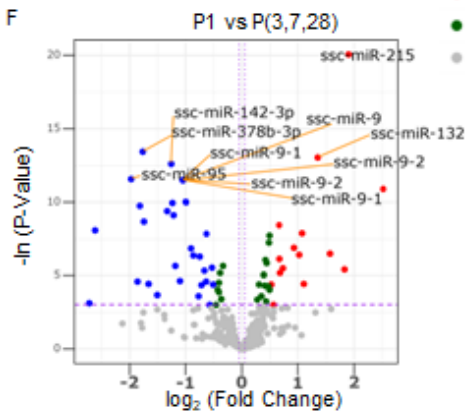

1 **Supplemental Figure 4. Differentially expressed miRNAs in neonatal pig hearts. (A)**  
2 PCA visualization of 12 miRNA samples obtained from 12 pig hearts at different postnatal  
3 days (P1, P3, P7, and P28). **(B)** Barplot showing the counts of significantly differentially  
4 expressed miRNAs. MicroRNAs with a  $\log_2FC > 0.5$  and p value  $< 0.05$  were classified  
5 as significantly upregulated (in orange) while circRNAs with a  $\log_2FC < -0.5$  and p value  
6  $< 0.05$  were classified as significantly downregulated (in teal). **(C-F)** Volcano plot  
7 visualizing differential expression analysis of miRNA at different experimental designs  
8 including **(C)** P1 versus P3, **(D)** P1 versus P7, **(E)** P1 versus P28, and **(F)** P1 versus P3,  
9 P7 and P28. miRNAs were categorized as significantly upregulated if they had a p value  
10  $< 0.05$  and  $\log_2FC > 0.5$  (Up\_significant distinguished in red), significantly downregulated  
11 if they had a p value  $< 0.05$  and  $\log_2FC < -0.5$  (Down\_significant distinguished in blue),  
12 significant but neither upregulated nor downregulated if the p value  $< 0.05$  but  $\log_2FC <$   
13  $0.05$  (distinguished in green), otherwise nonsignificant ( distinguished in grey).

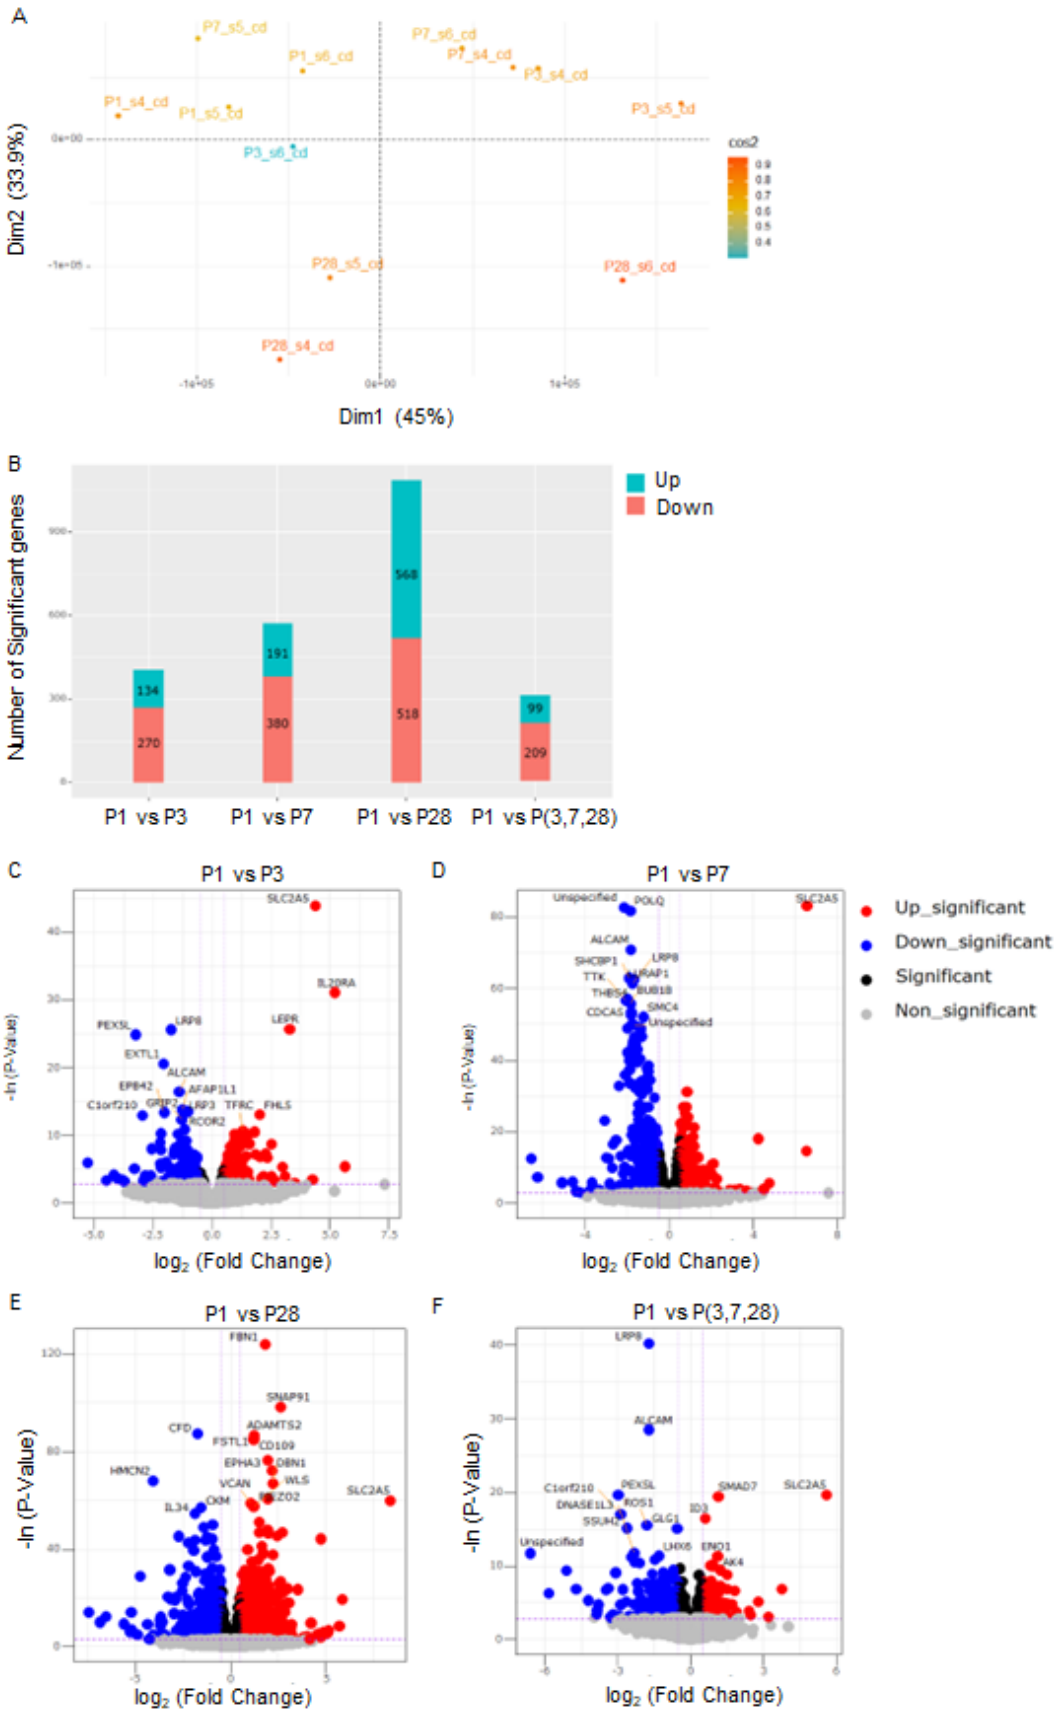



1 **Supplemental Figure 5. Differentially expressed mRNAs in neonatal pig hearts. (A)**  
2 PCA visualization of 12 mRNA samples obtained from 12 pig hearts at different postnatal  
3 days (P1, P3, P7, and P28). **(B)** Barplot showing the counts of significantly differentially  
4 expressed mRNAs. mRNAs with a  $\log_2FC > 0.5$  and p value  $< 0.05$  were classified as  
5 significantly upregulated (in orange) while mRNAs with a  $\log_2FC < -0.5$  and p value  $< 0.05$   
6 were classified as significantly downregulated (in teal). **(C-F)** Volcano plot visualizing  
7 differential expression analysis of mRNA from various comparisons including **(C)** P1  
8 versus P3, **(D)** P1 versus P7, **(E)** P1 versus P28, and **(F)** P1 versus P3, P7 and P28.  
9 mRNAs were categorized as significantly upregulated if they had a p value  $< 0.05$  and  
10  $\log_2FC > 0.5$  (Up\_significant in red), significantly downregulated if they had a p value  $<$   
11  $0.05$  and  $\log_2FC < -0.5$  (Down\_significant in blue), significant but neither upregulated nor  
12 downregulated if p value  $< 0.05$  but  $\log_2FC < 0.05$  (in dark), otherwise nonsignificant (in  
13 grey).

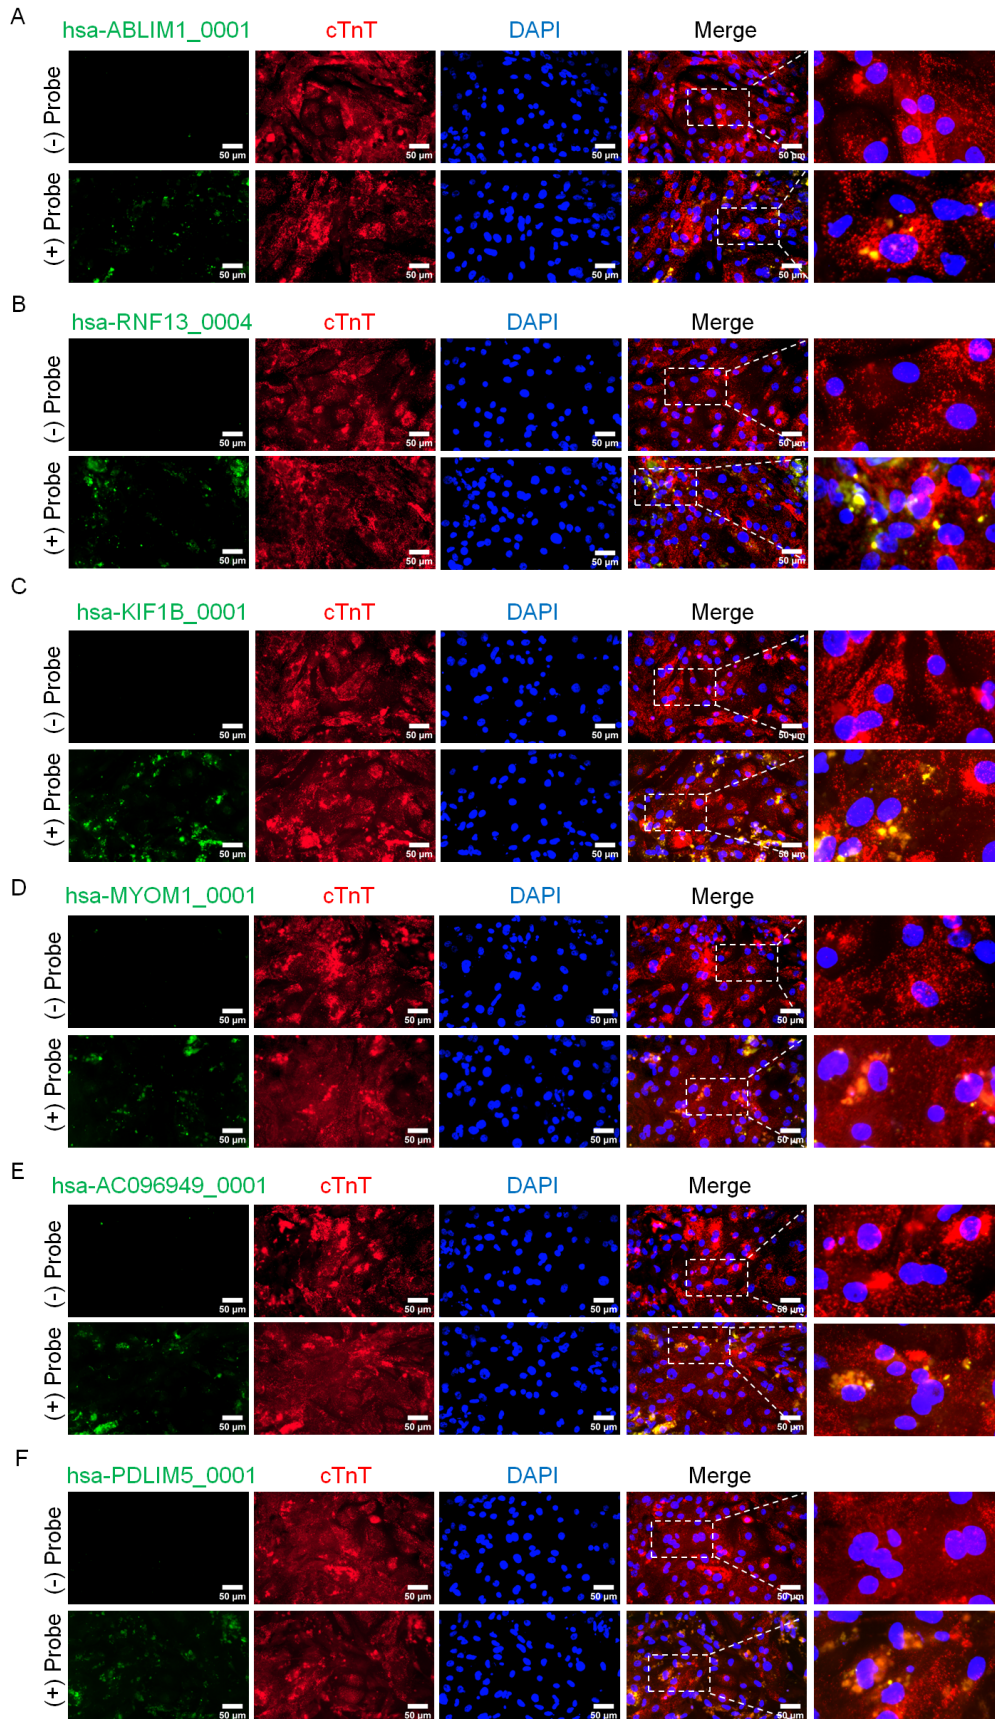

1 **Supplemental Figure 6. Intracellular localizations of circRNAs.** hiPSC-CMs at day 28  
2 after the initiation of cardiac differentiation were utilized. The intracellular location of each  
3 circRNA was visualized using an Alexa Fluorescent 488 probe targeting the specific  
4 circRNA. Cardiomyocytes were identified using an Alexa Fluorescent 568 probe targeting  
5 human cTnT RNA. All cell nuclei were stained with DAPI. Representative images  
6 displaying the cytoplasmic and nuclear distribution of hsa-ABLIM1\_0001 **(A)**, hsa-  
7 RNF13\_0004 **(B)**, hsa-KIF1B\_0001 **(C)**, hsa-MYOM1\_0001 **(D)**, hsa-AC096949\_0001  
8 **(E)**, and hsa-PDLIM5\_0001 **(F)** in hiPSC-CMs were captured.

9

A

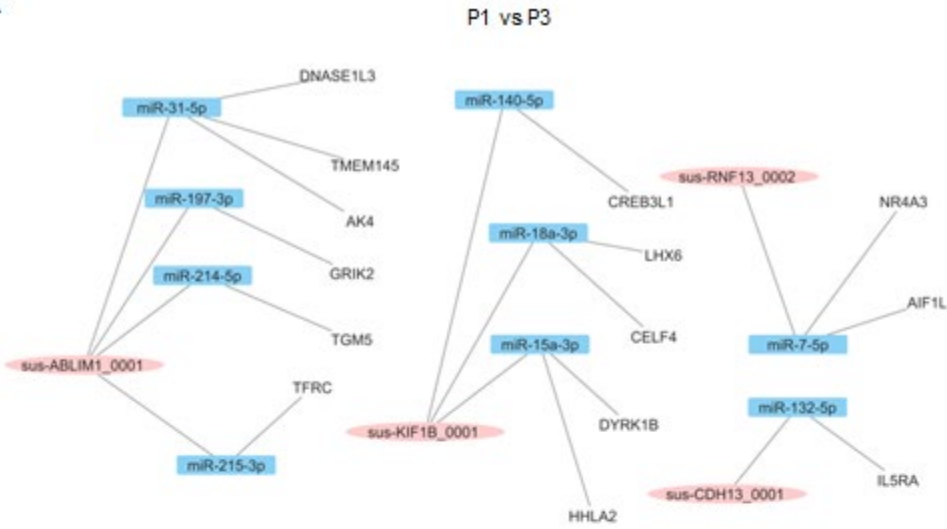

B

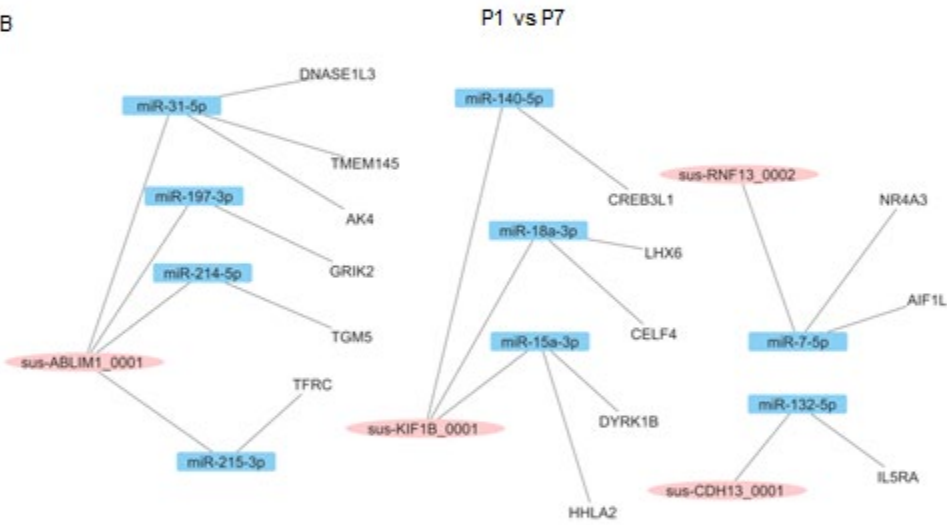

C

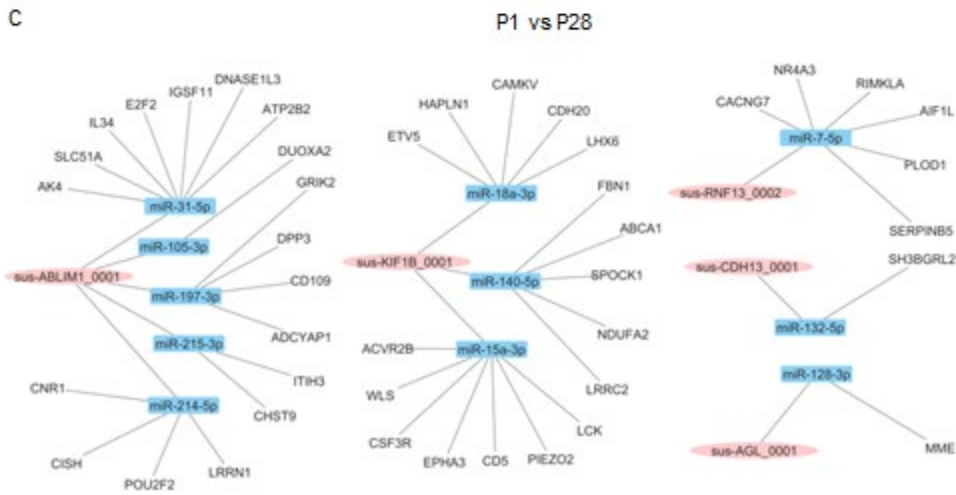

1 **Supplemental Figure 7. Integrated networking analysis of circRNA–miRNA–mRNA**  
2 **interactions.** Network diagram illustrates the interactions between circRNAs and  
3 miRNAs, as well as miRNA and mRNAs in the comparisons of P1 versus P3 **(A)**, P1  
4 versus P7 **(B)**, and P1 versus P28 **(C)**.

5

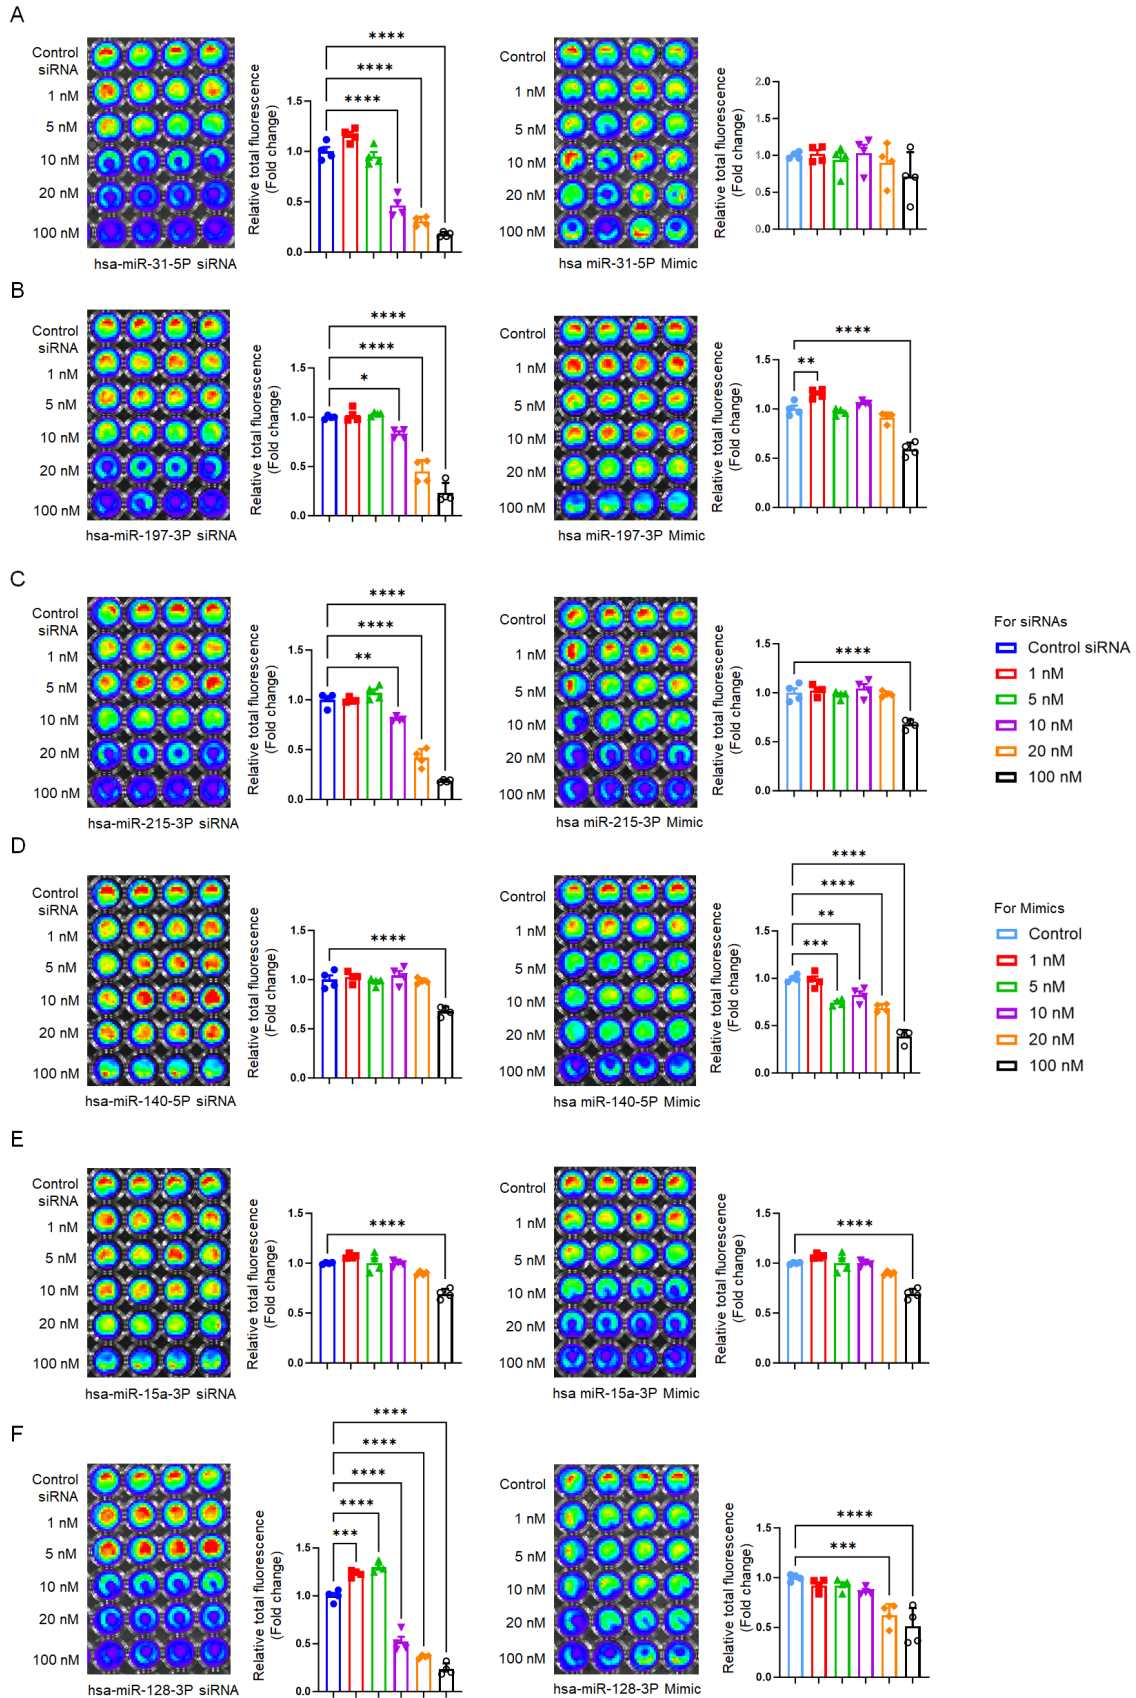

1 **Supplemental Figure 8. Evaluation of the cell cycle regulatory function of miRNAs.**

2 hiPSC-CMs at day 28 after initiation of cardiac differentiation were utilized. The cells were  
3 treated with either negative control siRNA, or various concentration (1, 4, 10, 20, and  
4 100nM) of specific human miRNA siRNAs for 3 days. Cell number was measured using  
5 bioluminescence analysis for hiPSC-CMs treated with siRNAs or mimics for (A) hsa-miR-  
6 128-3p, (B) has-miR-197-3p, (C) has-miR-215-3p, (D) has-miR-140-5p, (E) has-miR-15a-  
7 3p, and (F) has-miR-128-3p. All data were presented as mean  $\pm$  SEM. Statistical analysis  
8 was performed via the Student's t-test. n=4 in each group. \*p<0.05, \*\*p<0.01, \*\*\*p<0.001,  
9 and \*\*\*\*p<0.0001.

10

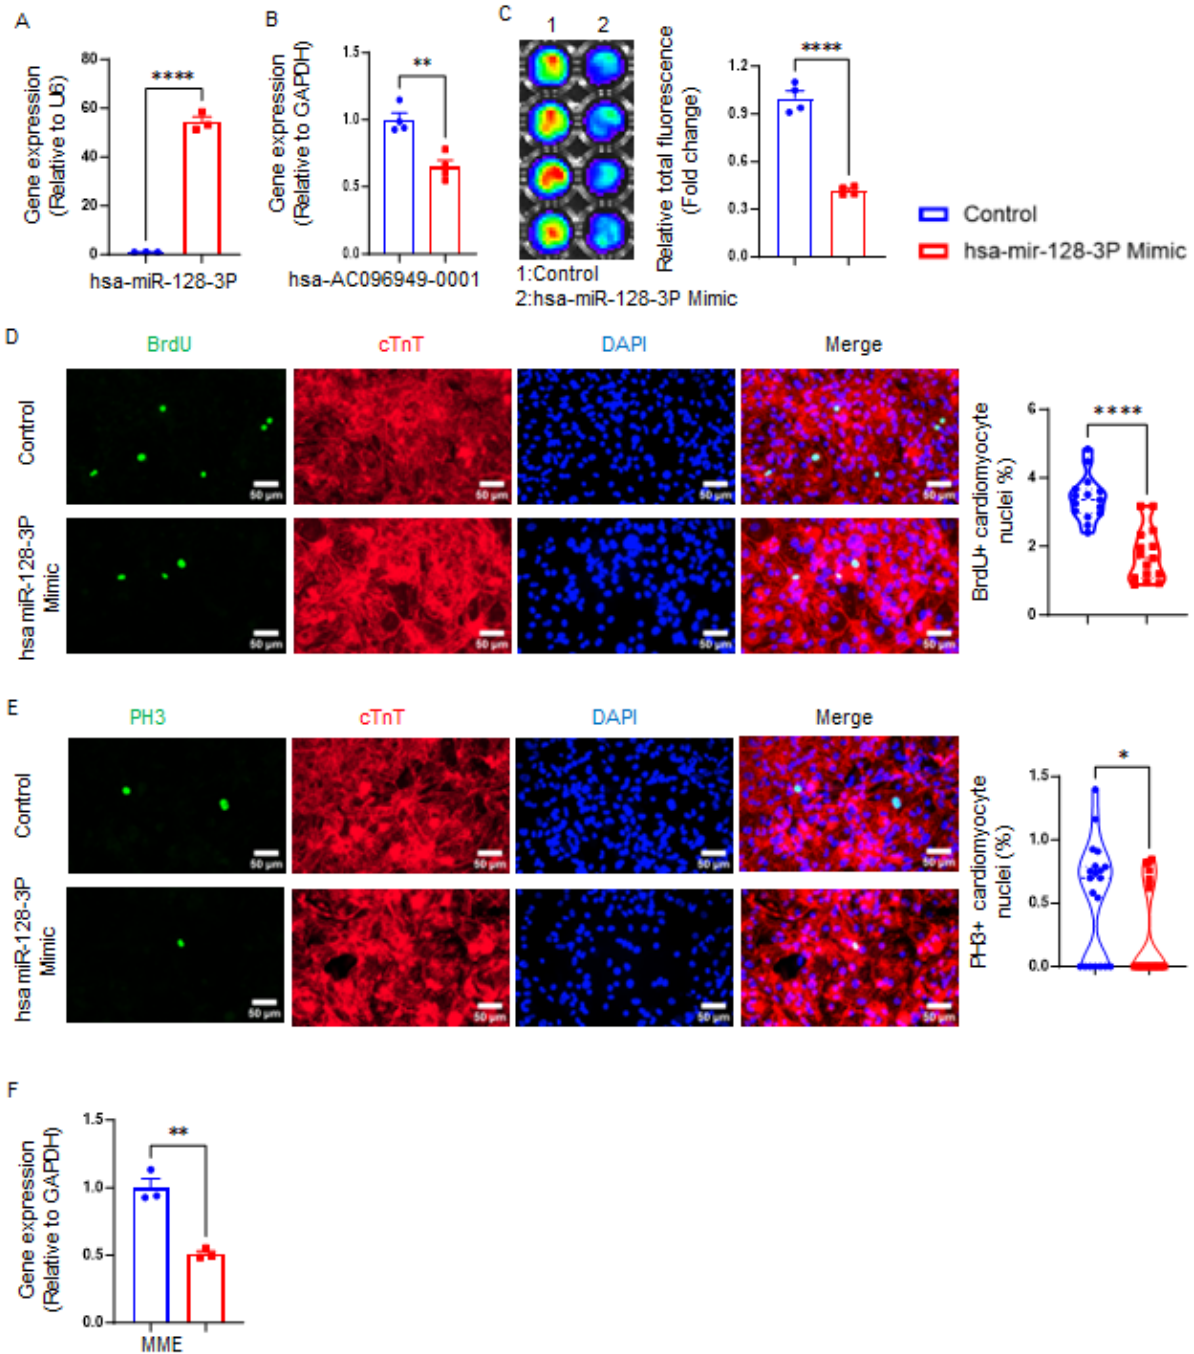

1

2 **Supplemental Figure 9. Evaluation of the cell cycle regulatory function of has-miR-**

3 **128-3p mimics.** hiPSC-CMs at day 28 after initiation of cardiac differentiation were used.

4 The efficiency of miRNA mimic-based activation in hiPSC-CMs was determined through

5 qRT-PCR. The expression levels of circRNAs were normalized to GAPDH reference gene.



1 The expression levels of miRNAs were normalized to U6 reference gene. Cell numbers  
2 were measured using bioluminescence analysis. Cell cycle activity was determined by  
3 immunostaining using antibodies against BrdU and PH3. Cardiomyocytes were identified  
4 using anti-human cTnT immunostaining. All cell nuclei were stained with DAPI. The BrdU  
5 or PH3 positively stained cardiomyocyte nuclei were normalized to the total number of  
6 cardiomyocyte nuclei and the results were presented as a percentage. **(A-B)** Expression  
7 of hsa-miR-128-3p **(A)** and its target circRNA hsa-AC096949-0001 **(B)** in the cells treated  
8 with has-miR-128-3p mimics was evaluated. **(C-E)** The hsa-miR-128-3p mimics inhibited  
9 cell proliferation as indicated by reduced bioluminescence signal **(C)** and the decrease in  
10 the prevalence of BrdU- and PH3-positively stained cardiomyocyte nuclei **(D and E)**. **(F)**  
11 hsa-miR-128-3p mimics also inhibited the expression of MME. All data were presented  
12 as mean  $\pm$  SEM. Statistical analysis was performed via the Student's t-test. n=3 technical  
13 replicates in each group for panels A and F. n=4 technical replicates in each group for  
14 panels B and C. n=15 technical replicates in each group for panel D. n=20 technical  
15 replicates in each group for panel E. \*p<0.05, \*\*p<0.01, \*\*\*p<0.001, and \*\*\*\*p<0.0001.  
16

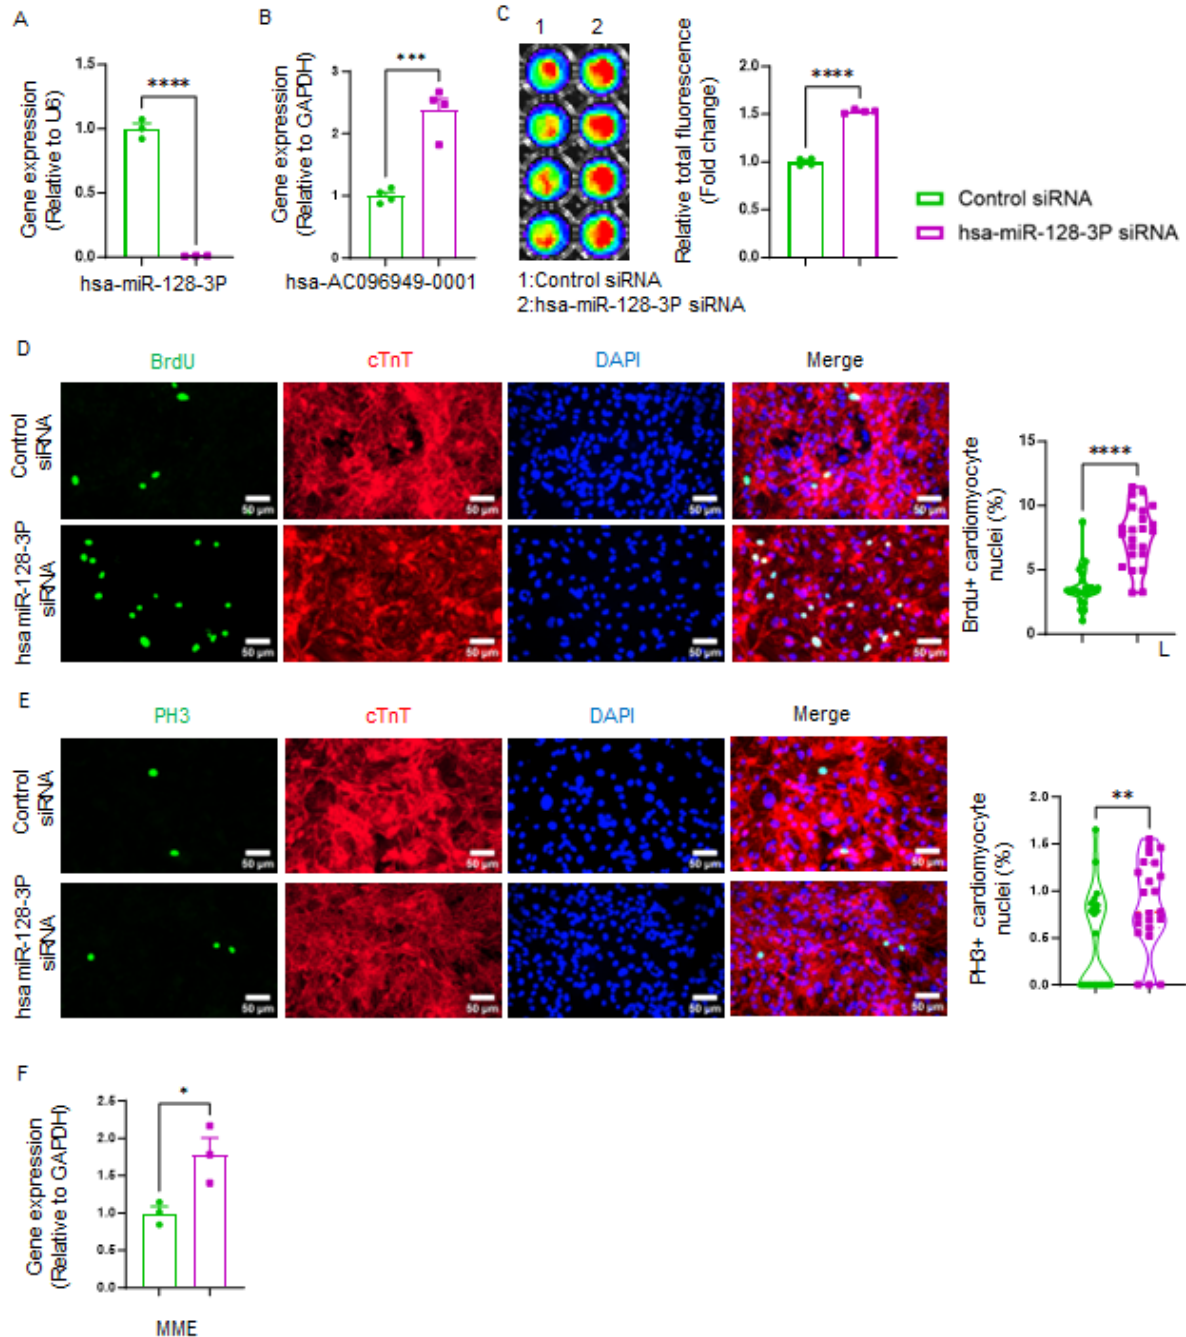

1

2 **Supplemental Figure 10. Evaluation of the cell cycle regulatory function of has-**  
 3 **miR-128-3p siRNAs.** hiPSC-CMs at day 28 after initiation of cardiac differentiation were  
 4 used. The efficiency of siRNA-based knockdown of miRNAs in hiPSC-CMs was  
 5 determined through qRT-PCR. The expression levels of circRNAs were normalized to

1 GAPDH reference gene. Cell numbers were measured using bioluminescence analysis.  
2 Cell cycle activity was determined by immunostaining using antibodies against BrdU and  
3 PH3. Cardiomyocytes were identified using anti-human cTnT immunostaining. All cell  
4 nuclei were stained with DAPI. The BrdU or PH3 positively stained cardiomyocyte nuclei  
5 were normalized to the total number of cardiomyocyte nuclei and the results were  
6 presented as a percentage. **(A-B)** Expression of hsa-miR-128-3p **(A)** and its target  
7 circRNA hsa-AC096949-0001 **(B)** in the cells treated with has-miR-128-3p siRNAs was  
8 evaluated. **(C-E)** The hsa-miR-128-3p siRNAs promoted cell proliferation as shown by  
9 the increase in bioluminescence signal **(C)** and the greater prevalence of BrdU- and PH3-  
10 positively stained cardiomyocyte nuclei **(D and E)**. **(F)** hsa-miR-128-3p siRNAs also  
11 enhanced the expression of MME. All data were presented as mean  $\pm$  SEM. Statistical  
12 analysis was performed via the Student's t-test. n=3 technical replicates in each group for  
13 panels A and F. n=4 technical replicates in each group for panels B and C. n=23 technical  
14 replicates in each group for panels D and E. \*p<0.05, \*\*p<0.01, \*\*\*p<0.001, and  
15 \*\*\*\*p<0.0001.

16

17

1 **Supplemental table 1. Batch information for RNA sequencing of neonatal pig**  
 2 **hearts**

| <b>Batch ID</b> | <b>Pig ID</b>                                                                         | <b>Company</b> | <b>RNA sequencing</b> | <b>Data analysis</b>                                      |
|-----------------|---------------------------------------------------------------------------------------|----------------|-----------------------|-----------------------------------------------------------|
| nv1             | P1-s1, P1-s2, P1-s3; P3-s1; P3-s2, P3-s3; P7-s1; P7-s2; P7-s3; P28-s1; P28-s2; P28-s3 | Novogene       | circRNA only          | circRNA (Figure 2)                                        |
| cd              | P1-s4, P1-s5, P1-s6; P3-s4; P3-s5, P3-s6; P7-s4; P7-s5; P7-s6; P28-s4; P28-s5; P28-s6 | CD Genomics    | Total RNA             | circRNA (Figure 2); miRNA (Figure 3); and mRNA (Figure 4) |
| nv2             | P1-s1, P1-s2, P1-s3; P3-s1; P3-s2, P3-s3; P7-s1; P7-s2; P7-s3; P28-s1; P28-s2; P28-s3 | Novogene       | Total RNA             | circRNA (Figure 2)                                        |

3

1 **Supplemental table 2. Hallmark gene sets from pathway enrichment analysis of**  
 2 **pig circRNAs**

| <b>Groups</b> | <b>Pathway</b>                         | <b>Leading edge genes</b>                                                                                                  |
|---------------|----------------------------------------|----------------------------------------------------------------------------------------------------------------------------|
| P1 vs P3      | HALLMARK_MTORC1_SIGNALIN<br>G          | USO1, GGA2, NUFIP1, IFRD1,<br>GSK3B, GSR, PGM1, CANX,<br>GBE1, FADS1, MTHFD2L, IDH1                                        |
| P1 vs P3      | HALLMARK_MYOGENESIS                    | CDH13, SVIL, BAG1, IFRD1,<br>MYOM1, AGL, ABLIM1, MEF2C                                                                     |
| P1 vs P3      | HALLMARK_MITOTIC_SPINDLE               | DST, MYH10, KIF1B, RANBP9,<br>CDC42, TLK1, STAU1,<br>DLGAP5, KIF20B, NF1,<br>OPHN1, ROCK1, RICTOR,<br>DLG1, PDLIM5, KIFAP3 |
| P1 vs P3      | HALLMARK_MYC_TARGETS_V1                | EIF4G2, XPOT, UBA2,<br>FAM120A, IFRD1, CUL1,<br>NAP1L1, CLNS1A, VDAC1,<br>DHX15, SRPK1, SYNCRIP,<br>CANX                   |
| P1 vs P3      | HALLMARK_PROTEIN_SECRETI<br>ON         | SEC31A, DST, KIF1B, USO1,<br>GOLGA4, PAM, ARCN1,<br>ATP1A1, ARFIP1                                                         |
| P1 vs P3      | HALLMARK_OXIDATIVE_PHOSP<br>HORYLATION | OAT, HADHA, PDHX, CPT1A,<br>NNT, IDH3A, ACADM, IDH2,                                                                       |

|          |                                 |                                                                                                                                            |
|----------|---------------------------------|--------------------------------------------------------------------------------------------------------------------------------------------|
|          |                                 | MTX2, VDAC1, ECH1,<br>ATP6V1C1, IDH1, AFG3L2                                                                                               |
| P1 vs P3 | HALLMARK_ADIPOGENESIS           | GPHN, BCL2L13, ANGPT1,<br>IDH3A, ACADM, PDCD4,<br>PGM1, DBT, ECH1, GBE1,<br>PPM1B, IDH1                                                    |
| P1 vs P3 | HALLMARK_SPERMATOGENESIS        | MLLT10, STRBP, BRAF, EZH2,<br>ZBPB                                                                                                         |
| P1 vs P7 | HALLMARK_MYOGENESIS             | ABLIM1, SVIL, MEF2A, RB1,<br>CDH13, MYOM1, SORBS1,<br>ACTN2, BAG1, DMD, MEF2C                                                              |
| P1 vs P7 | HALLMARK_ESTROGEN_RESPONSE_LATE | PDCD4, FKBP5, CHPT1,<br>UNC13B, FDFT1, IDH2, IL6ST,<br>BAG1                                                                                |
| P1 vs P7 | HALLMARK_MITOTIC_SPINDLE        | DLG1, KIF20B, ROCK1, NF1,<br>TLK1, RANBP9, DST, CDC27,<br>CENPF, KIFAP3, PDLIM5,<br>ARFGEF1, ARHGEF12,<br>RAB3GAP1, KIF5B, PALLD,<br>MYH10 |
| P1 vs P7 | HALLMARK_UV_RESPONSE_DN         | DLG1, VAV2, SCAF8,<br>BCKDHB, ATRN, ATP2C1,                                                                                                |

|           |                            |                                                                                                                                                                                                             |
|-----------|----------------------------|-------------------------------------------------------------------------------------------------------------------------------------------------------------------------------------------------------------|
|           |                            | VLDLR, AKT3, INPP4B,<br>PDLIM5, LAMC1                                                                                                                                                                       |
| P1 vs P28 | HALLMARK_MITOTIC_SPINDLE   | ARHGEF12, RANBP9,<br>ARFGEF1, DST, CDC27,<br>KIFAP3, DLGAP5, ALMS1,<br>TLK1, CDC42BPA, CCNB2,<br>DLG1, KIF1B, PDLIM5, PKD2,<br>RAB3GAP1, ROCK1, LRPPRC,<br>MYO1E, NF1, STAU1, CENPF,<br>CLIP1, MYH10, TOP2A |
| P1 vs P28 | HALLMARK_MYC_TARGETS_V1    | SYNCRIP, DDX21, XPO1,<br>DHX15, XPOT, FAM120A, DEK,<br>CCT3, CUL1, CANX                                                                                                                                     |
| P1 vs P28 | HALLMARK_PROTEIN_SECRETION | GOLGA4, ARFGEF1, DST,<br>MAPK1, ARFGAP3, USO1,<br>ARFIP1, PAM, ARFGEF2,<br>KIF1B, STX12, COPB1,<br>SEC31A                                                                                                   |
| P1 vs P28 | HALLMARK_MTORC1_SIGNALING  | GGA2, GSK3B, USO1, ENO1,<br>FADS1, PGM1, ME1, PDK1,<br>CANX, SSR1, DDX39A,<br>NUFIP1                                                                                                                        |

|           |                                                |                                                                                                                                                                            |
|-----------|------------------------------------------------|----------------------------------------------------------------------------------------------------------------------------------------------------------------------------|
| P1 vs P28 | HALLMARK_G2M_CHECKPOINT                        | SYNCRIP, CDC27, DMD,<br>XPO1, TOP1, CCNB2, CUL5,<br>SLC7A1, CUL1, NUP98,<br>SLC38A1, DDX39A, CENPF,<br>CBX1, TOP2A, RBL1, KIF4A,<br>SS18, EZH2, SQLE, KIF20B,<br>WRN, ABL1 |
| P1 vs P28 | HALLMARK_MYOGENESIS                            | SVIL, DMD, MYH7, MEF2C,<br>MEF2A, ABLIM1, MYOM1,<br>AGL, BAG1, SH3BGR, RB1,<br>APP                                                                                         |
| P1 vs P28 | HALLMARK_ESTROGEN_RESPO<br>NSE_LATE            | IDH2, FDFT1, PDCD4,<br>UNC13B, MOCS2, FKBP5,<br>BAG1, TOP2A                                                                                                                |
| P1 vs P28 | HALLMARK_E2F_TARGETS                           | SYNCRIP, DLGAP5, XPO1,<br>ATAD2, CCNB2, DEK, PRKDC,<br>DDX39A, PRPS1, PMS2,<br>TOP2A, NAP1L1, KIF4A,<br>RBBP7, EZH2, MELK                                                  |
| P1 vs P28 | HALLMARK_EPITHELIAL_MESEN<br>CHYMAL_TRANSITION | DST, HTRA1, BMP1                                                                                                                                                           |
| P1 vs P28 | HALLMARK_OXIDATIVE_PHOSP<br>HORYLATION         | IDH2, ACADM, PDHX, ACAT1,<br>NDUFS2, DLD, MTX2,                                                                                                                            |



|           |                                    |                                                                                                                     |
|-----------|------------------------------------|---------------------------------------------------------------------------------------------------------------------|
|           |                                    | SUCLA2, LRPPRC, IDH3A,<br>HADHA, ATP6V1C1, SUCLG1,<br>OAT, ETFA, ECH1, AFG3L2,<br>RHOT1, ETFDH                      |
| P1 vs P28 | HALLMARK_HEME_METABOLISM           | ARHGEF12, RBM5, CDC27,<br>EIF2AK1, TOP1, ADD1,<br>MOSPD1, UROS, EZH1,<br>DCAF10, SYNJ1, KDM7A,<br>GAPVD1            |
| P1 vs P28 | HALLMARK_ADIPOGENESIS              | ACADM, PTC3, PDCD4,<br>ANGPT1, DLD, PGM1, ME1,<br>ARAF, DBT, IDH3A, ACOX1,<br>SUCLG1, BCL2L13, PPM1B,<br>ECH1, HADH |
| P1 vs P28 | HALLMARK_FATTY_ACID_META<br>BOLISM | ACADM, BCKDHB, PPARA,<br>DLD, SUCLA2, ME1, UROS,<br>ACOX1, SUCLG1, ECH1,<br>HADH, ETFDH, RDH11                      |
| P1 vs P28 | HALLMARK_APICAL_JUNCTION           | CNN2, BMP1, NEXN, DLG1,<br>AKT3, ADAM23, CTNNA1, NF1,<br>MYH10, HADH, SYMPK, VAV2                                   |

|                    |                                |                                                                                                                                                                           |
|--------------------|--------------------------------|---------------------------------------------------------------------------------------------------------------------------------------------------------------------------|
| P1 vs<br>P(3,7,28) | HALLMARK_MITOTIC_SPINDLE       | DST, RANBP9, TLK1, DLG1,<br>CDC27, ARHGEF12, NF1,<br>KIFAP3, KIF1B, MYH10,<br>KIF20B, CDC42, ARFGEF1,<br>PDLIM5, DLGAP5, STAU1,<br>PKD2, CENPF, ALMS1,<br>ROCK1, RAB3GAP1 |
| P1 vs<br>P(3,7,28) | HALLMARK_MYOGENESIS            | SVIL, MYOM1, ABLIM1,<br>MEF2C, BAG1, MEF2A,<br>CDH13, RB1, AGL, SORBS1,<br>APP                                                                                            |
| P1 vs<br>P(3,7,28) | HALLMARK_PROTEIN_SECRETI<br>ON | DST, PAM, USO1, GOLGA4,<br>SEC31A, KIF1B, ARCN1,<br>ARFGEF1, OCRL, ARFIP1,<br>GALC                                                                                        |
| P1 vs<br>P(3,7,28) | HALLMARK_G2M_CHECKPOINT        | SYNCRIP, SLC38A1, CDC27,<br>KIF20B, NUP98, SS18, TOP1,<br>RBL1, ARID4A, CUL1, EZH2,<br>WRN, SLC7A1, DDX39A,<br>CENPF, XPO1                                                |
| P1 vs<br>P(3,7,28) | HALLMARK_MYC_TARGETS_V1        | SYNCRIP, FAM120A, DHX15,<br>NAP1L1, CUL1, UBA2, SRPK1,                                                                                                                    |

|                    |                               |                                                                                                           |
|--------------------|-------------------------------|-----------------------------------------------------------------------------------------------------------|
|                    |                               | XPOT, HDAC2, DDX21, XPO1,<br>DEK, PTGES3, CCT3                                                            |
| P1 vs<br>P(3,7,28) | HALLMARK_APICAL_JUNCTION      | DLG1, NF1, VAV2, AKT3,<br>MYH10, SYMPK, CNN2, NEXN,<br>CTNNA1                                             |
| P1 vs<br>P(3,7,28) | HALLMARK_ADIPOGENESIS         | ACADM, PDCD4, ANGPT1,<br>PPM1B, PGM1, IDH3A,<br>BCL2L13, DBT, ME1, DLD,<br>ECH1, SORBS1, GPHN,<br>PTCD3   |
| P1 vs<br>P(3,7,28) | HALLMARK_HEME_METABOLISM      | RBM5, MOSPD1, CDC27,<br>ARHGEF12, EIF2AK1, KDM7A,<br>TOP1, GAPVD1, NNT, PICALM,<br>ADD1, CAST, EZH1, BTRC |
| P1 vs<br>P(3,7,28) | HALLMARK_MTORC1_SIGNALIN<br>G | GGA2, USO1, NUFIP1, PGM1,<br>MTHFD2L, GSK3B, DDX39A,<br>ME1, VLDLR, PDK1, GSR                             |

---

1 **Supplemental table 3. Hallmark gene sets from pathway enrichment analysis of**  
 2 **pig mRNAs**

| <b>Groups</b> | <b>Pathway</b>                                 | <b>Leading edge genes</b>                                                                                                                                                                                |
|---------------|------------------------------------------------|----------------------------------------------------------------------------------------------------------------------------------------------------------------------------------------------------------|
| P1 vs P3      | HALLMARK_INTERFERON_ALPHA<br>_RESPONSE         | ISG15, PARP14, IFI44, MX1,<br>IFI44L, UBE2L6, PLSCR1, BST2,<br>TRIM14, B2M, IFI30, PARP9,<br>TENT5A                                                                                                      |
| P1 vs P3      | HALLMARK_INTERFERON_GAMM<br>A_RESPONSE         | ISG15, PARP14, IFI44, MX1,<br>IFI44L, SOD2, UBE2L6,<br>PLSCR1, BST2, CD86, MX2,<br>TRIM14, B2M, IFI30                                                                                                    |
| P1 vs P3      | HALLMARK_HYPOXIA                               | SLC2A5, EDN2, CCN2, AK4,<br>TMEM45A, CP, HAS1, ENO1,<br>ADM, ERO1A, RORA, ZNF292,<br>FAM162A, ANXA2                                                                                                      |
| P1 vs P3      | HALLMARK_EPITHELIAL_MESENC<br>HYMAL_TRANSITION | PTX3, FSTL3, CCN2, PLOD2,<br>CRLF1, SPOCK1, FBN1, PFN2,<br>LAMA3, FSTL1, TNC, COL12A1,<br>CDH11, TPM1, NT5E, VCAN,<br>COL8A2, PLAUR, TPM4,<br>GADD45A, PLOD1, FBLN2,<br>ABI3BP, FERMT2, GADD45B,<br>EMP3 |

|          |                                        |                                                                                                                                                                                                                         |
|----------|----------------------------------------|-------------------------------------------------------------------------------------------------------------------------------------------------------------------------------------------------------------------------|
| P1 vs P7 | HALLMARK_HYPOXIA                       | SLC2A5, HAS1, ENO1, ALDOB,<br>PFKL, ISG20, PLAUR, AK4,<br>TMEM45A, BHLHE40, SLC6A6,<br>ERO1A, GAPDHS, PRDX5,<br>RRAGD, FAM162A, ZNF292,<br>NCAN, P3H1, PPP1R15A,<br>ERRFI1                                              |
| P1 vs P7 | HALLMARK_INTERFERON_ALPHA<br>_RESPONSE | ISG15, MX1, ISG20, BST2,<br>IFI30, UBE2L6, PARP14,<br>PARP9, IFI44, BATF2, MVB12A,<br>PLSCR1                                                                                                                            |
| P1 vs P7 | HALLMARK_OXIDATIVE_PHOSPH<br>ORYLATION | NDUFA2, ATP5F1D, COX8A,<br>NDUFB4, LDHB, NDUFS8,<br>TCIRG1, ATP6V0B, ATP5PF,<br>COX4I1, CYB5A, NDUFV1,<br>ATP5PO, ATP5F1A, GPX4,<br>NDUFS3, OPA1, UQCRC1,<br>COX7A2, NDUFV2, TOMM70,<br>TIMM10, NDUFA8, MRPS22,<br>SDHB |
| P1 vs P7 | HALLMARK_INTERFERON_GAMM<br>A_RESPONSE | ISG15, MX1, ISG20, BST2,<br>IFI30, UBE2L6, SOD2, MX2,                                                                                                                                                                   |

|          |                           |                                                                                                                                                                                           |
|----------|---------------------------|-------------------------------------------------------------------------------------------------------------------------------------------------------------------------------------------|
|          |                           | PARP14, IFI44, BATF2,<br>PLSCR1, IRF8                                                                                                                                                     |
| P1 vs P7 | HALLMARK_MTORC1_SIGNALING | ENO1, PFKL, TFRC, IFI30, AK4,<br>BHLHE40, SLC6A6, ERO1A,<br>CTH, FADS1, P3H1, FKBP2,<br>SERP1, ME1, TOMM40,<br>HMGCR, PPP1R15A, STIP1,<br>ITGB2, PSMC4, GBE1, HSPA5,<br>PLOD2             |
| P1 vs P7 | HALLMARK_G2M_CHECKPOINT   | TTK, CDC20, KIF23, NDC80,<br>POLQ, CDKN3, CDKN2C,<br>CCNB2, KIF2C, CHAF1A,<br>RAD54L, INCENP, MCM2, E2F2,<br>STMN1, FBXO5, SMC4, KIF15,<br>SMC2, RPA2, GINS2, STIL,<br>UBE2S, ORC6, HMGN2 |
| P1 vs P7 | HALLMARK_E2F_TARGETS      | CDC20, BUB1B, CDKN3,<br>DLGAP5, CDKN2C, CCNB2,<br>KIF2C, GINS3, MCM2, MELK,<br>CDCA8, STMN1, DEPDC1,<br>SMC4, WEE1, MMS22L, RPA2,<br>POLD1, PSIP1, UBE2S, LIG1,<br>ORC6, DUT              |

|           |                                                |                                                                                                                                                                                                                            |
|-----------|------------------------------------------------|----------------------------------------------------------------------------------------------------------------------------------------------------------------------------------------------------------------------------|
| P1 vs P7  | HALLMARK_MITOTIC_SPINDLE                       | TTK, PIF1, KIF23, NDC80,<br>DLGAP5, CCNB2, KIF2C,<br>INCENP, FBXO5, SMC4, KIF15,<br>ECT2, CDK5RAP2, CKAP5                                                                                                                  |
| P1 vs P28 | HALLMARK_EPITHELIAL_MESENC<br>HYMAL_TRANSITION | TNC, COL8A2, LAMA1, PTX3,<br>FBN1, SPOCK1, NT5E, CDH11,<br>TPM4, COL12A1, LAMA3,<br>FSTL1, APLP1, PLOD1, OXTR,<br>VCAN, PLOD2, GADD45A,<br>LRRC15, FBLN2, COL5A1,<br>CRLF1, PLAUR, GPX7, THBS2,<br>EMP3, PFN2, TGFBI, PPIB |
| P1 vs P28 | HALLMARK_SPERMATOGENESIS                       | SLC2A5, SNAP91, ADCYAP1,<br>SCG3, KIF2C, CCNB2, TEK2,<br>MEP1B, TTK, PHF7, GAPDHS,<br>PCSK4                                                                                                                                |
| P1 vs P28 | HALLMARK_G2M_CHECKPOINT                        | KIF15, E2F2, KIF23, CHAF1A,<br>SLC7A5, KIF2C, RAD54L,<br>NDC80, CCNB2, MCM2, GINS2,<br>TTK, FBXO5, STIL, UBE2S,<br>POLQ, STMN1, CDC20, SMC2,<br>SNRPD1, MARCKS                                                             |

|           |                                        |                                                                                                                                                        |
|-----------|----------------------------------------|--------------------------------------------------------------------------------------------------------------------------------------------------------|
| P1 vs P28 | HALLMARK_HYPOXIA                       | SLC2A5, HAS1, CP, TMEM45A,<br>LXN, AK4, ENO1, PFKL, ANXA2,<br>EDN2, GAPDHS, NCAN, TPBG,<br>COL5A1, PLAUR, TGFBI,<br>SLC6A6, AKAP12, AMPD3,<br>CA12     |
| P1 vs P28 | HALLMARK_MTORC1_SIGNALING              | PSAT1, ME1, AK4, ENO1, PFKL,<br>SLC7A5, HMGCR, PLOD2,<br>MCM2, FADS1, PRDX1, PSMC4,<br>SLC6A6, ARPC5L, TOMM40,<br>TFRC, SORD, SLC1A5, IFI30,<br>DHCR24 |
| P1 vs P28 | HALLMARK_E2F_TARGETS                   | CDCA8, DEPDC1, MELK,<br>DLGAP5, KIF2C, BUB1B,<br>CCNB2, MCM2, MMS22L,<br>UBE2S, STMN1, CTPS1,<br>CDC20, TFRC                                           |
| P1 vs P28 | HALLMARK_OXIDATIVE_PHOSPH<br>ORYLATION | COX7A2, NDUFA2, COX8A,<br>SLC25A20, ATP5F1A, ATP5PO,<br>NDUFA8, OPA1, GOT2,<br>ATP6V0B, UQCRC1, ATP5F1D,<br>NDUFB4, TIMM10, MRPL34,                    |



|                    |                                                |                                                                                                                                   |
|--------------------|------------------------------------------------|-----------------------------------------------------------------------------------------------------------------------------------|
|                    |                                                | NDUFV1, ETFB, MRPS15,<br>GPX4, ALAS1, NDUFS3,<br>ATP5PF, NDUFV2, TOMM70,<br>MRPS11                                                |
| P1 vs P28          | HALLMARK_ALLOGRAFT_REJECT<br>ION               | SIT1, TRAT1, PRKCG, LCK,<br>IL12RB1, CCR2, MAP4K1,<br>CCR5, CD80, NLRP3, CD96,<br>NCR1, CD86, SPI1                                |
| P1 vs P28          | HALLMARK_INTERFERON_ALPHA<br>_RESPONSE         | ISG20, BATF2, IFI44L, TENT5A,<br>UBA7, IFI44, MX1, ISG15,<br>PARP9, PARP14                                                        |
| P1 vs P28          | HALLMARK_INTERFERON_GAMM<br>A_RESPONSE         | ISG20, BATF2, IFI44L, NLRC5,<br>IFI44, MX1, ISG15, PARP14,<br>CD274, CD86, EIF4E3, B2M,<br>UBE2L6, PDE4B, TNFAIP3,<br>TRIM14, MX2 |
| P1 vs P28          | HALLMARK_INFLAMMATORY_RE<br>SPONSE             | CXCR6, TNFSF15, LCK, ROS1,<br>RASGRP1, CSF3R, C5AR1,<br>ABCA1, PTAFR, NLRP3                                                       |
| P1 vs<br>P(3,7,28) | HALLMARK_EPITHELIAL_MESENC<br>HYMAL_TRANSITION | PTX3, TNC, SPOCK1, COL8A2,<br>CDH11, COL12A1, PLOD2,<br>PLAUR, PFN2, PLOD1, FBN1,<br>VCAN, LAMA3, TPM4, APLP1,                    |

|                    |                                        |                                                                                                                                                                                                                                     |
|--------------------|----------------------------------------|-------------------------------------------------------------------------------------------------------------------------------------------------------------------------------------------------------------------------------------|
|                    |                                        | NT5E, FSTL1, EMP3, GADD45A,<br>PPIB, FSTL3, TPM1, FBLN2                                                                                                                                                                             |
| P1 vs<br>P(3,7,28) | HALLMARK_OXIDATIVE_PHOSPH<br>ORYLATION | NDUFA2, COX7A2, COX8A,<br>NDUFB4, ATP5F1A, ATP5PO,<br>ATP5F1D, OPA1, ATP5PF,<br>ATP6V0B, NDUFA8, SLC25A20,<br>CYB5A, GPX4, UQCRC1,<br>NDUFV2, MRPL34, TOMM70,<br>NDUFS3, GOT2, NDUFV1,<br>TIMM10, NDUFS8, TCIRG1,<br>MRPS15, COX4I1 |
| P1 vs<br>P(3,7,28) | HALLMARK_HYPOXIA                       | SLC2A5, HAS1, TMEM45A,<br>ENO1, AK4, CP, PFKL, EDN2,<br>PLAUR, SLC6A6, GAPDHS,<br>FAM162A, ANXA2, ERO1A,<br>ZNF292, RRAGD                                                                                                           |
| P1 vs<br>P(3,7,28) | HALLMARK_MTORC1_SIGNALING              | ENO1, AK4, TFRC, ME1,<br>PLOD2, PFKL, IFI30, HMGCR,<br>SLC6A6, ERO1A, PRDX1,<br>PSMC4, FADS1, SERP1,<br>TOMM40, FKBP2, SORD, ETF1,<br>PSAT1, SLC1A5, P3H1, PSMC6,<br>HSPA5                                                          |

|                    |                                      |                                                                                                                                                                                |
|--------------------|--------------------------------------|--------------------------------------------------------------------------------------------------------------------------------------------------------------------------------|
| P1 vs<br>P(3,7,28) | HALLMARK_G2M_CHECKPOINT              | CDC20, TTK, CDKN3, KIF23,<br>NDC80, INCENP, CDKN2C,<br>POLQ, RAD54L, CCNB2, KIF2C,<br>SLC7A5, CHAF1A, MCM2,<br>E2F2, TGFB1, SMC4, BCL3,<br>STMN1, TRAIIP, FBXO5, TLE3,<br>SMC2 |
| P1 vs<br>P(3,7,28) | HALLMARK_E2F_TARGETS                 | CDC20, GINS3, CDKN3,<br>CDKN2C, BUB1B, CCNB2,<br>WEE1, DLGAP5, KIF2C, PSIP1,<br>MCM2, POLD1, LIG1, SMC4,<br>CDCA8, STMN1, MMS22L,<br>MELK, DEPDC1, SSRP1, RPA2                 |
| P1 vs<br>P(3,7,28) | HALLMARK_ALLOGRAFT_REJECT<br>ION     | SIT1, LCK, TRAT1, PRKCG,<br>ELANE, IL12RB1, CCR2,<br>MAP4K1, CCR5, TGFB1, BCL3                                                                                                 |
| P1 vs<br>P(3,7,28) | HALLMARK_BILE_ACID_METABOL<br>ISM    | ALDH1A1, LCK, SULT2B1,<br>SLC27A5, LIPE, ABCA1,<br>ALDH8A1, RXRA                                                                                                               |
| P1 vs<br>P(3,7,28) | HALLMARK_ESTROGEN_RESPON<br>SE_EARLY | RASGRP1, SULT2B1, DHRS3,<br>PMAIP1, OLFM1, SLC7A5,<br>CISH, TTC39A, TPD52L1,<br>FAM102A, RPS6KA2, LRIG1,                                                                       |

|           |                          |                                                                                                                                                                                                |
|-----------|--------------------------|------------------------------------------------------------------------------------------------------------------------------------------------------------------------------------------------|
| P1 vs     | HALLMARK_MITOTIC_SPINDLE | CBFA2T3, SEMA3B, SH3BP5,<br>NRIP1, FRK                                                                                                                                                         |
| P(3,7,28) |                          | PIF1, TTK, KIF23, NDC80,<br>INCENP, CCNB2, DLGAP5,<br>KIF2C, SMC4, CDK5RAP2,<br>PLEKHG2, SYNPO, FBXO5,<br>ARAP3, MAP1S, EPB41, ABL1,<br>KPTN, TSC1, SPTAN1, ECT2,<br>CYTH2, KIF15, NCK1, CKAP5 |

---

**Supplemental table 4. Genomic information for validated circRNAs**

| <b>Conserved<br/>CircRNA ID<br/>(Used)</b> | <b>Chro<br/>mos<br/>ome</b>          | <b>circAtlas Location</b> | <b>Closest circRNA<br/>ID (as per our<br/>data)</b> | <b>circAtlas Location of<br/>closest circRNA</b> | <b>CD genomic location<br/>(Based on our data)</b> |
|--------------------------------------------|--------------------------------------|---------------------------|-----------------------------------------------------|--------------------------------------------------|----------------------------------------------------|
| sus-CDH13_0001                             | 6                                    | 5311874-5318531           | sus-CDH13_0001                                      | 5311874-5318531                                  | 5311873-5318531: -                                 |
| sus-ABLIM1_0001                            | 14                                   | 136012794-136046886       | sus-ABLIM1_0009                                     | 135917668-135932668                              | 135913411-135918906: -                             |
| sus-RNF13_0002                             | 13                                   | 98121118-98191973         | sus-RNF13_0006                                      | 98146479-98191973                                | 98162591-98191973:+                                |
| sus-KIF1B_0001                             | 6                                    | 64542087-64546864         | sus-KIF1B_0001                                      | 64542087-64546864                                | 64542086-64545302                                  |
| sus_MYOM1_0001                             | 6                                    | 96504635-96512930         | sus_MYOM1_0007                                      | 96528976-96559830                                | 96538670-96541892:+                                |
| sus_TB CD_0003                             | 12                                   | 315608-323713             | sus_TB CD_0001                                      | 289310-301790                                    | 301658-323714:+                                    |
| sus-PDLIM5_0001                            | 8                                    | 134379373-134409025       | sus-PDLIM5_0008                                     | 134355181-134379557                              | 134379372-134409025:-                              |
| sus-AGL_0001                               | 4                                    | 129654375-129659295       | sus-AGL_0386                                        | sus-AGL_VLJW2*                                   | 129789460-129792899                                |
| sus-<br>ENSSSCG000000<br>26041_0001        | No matching sequence in the database |                           |                                                     |                                                  |                                                    |

1

1 **Supplemental table 5. The match of pig circRNAs to their corresponding human**  
 2 **circRNAs**

| circRNA ID (pig)            | circRNA ID (human) |
|-----------------------------|--------------------|
| sus-CDH13_0001              | None               |
| sus-ABLIM1_0001             | hsa-ABLIM1_0001    |
| sus-RNF13_0002              | hsa-RNF13_0004     |
| sus-CDC42_0001              | None               |
| sus-KIF1B_0001              | hsa-KIF1B_0001     |
| sus-MYOM1_0001              | hsa-MYOM1_0001     |
| sus-TBCD_0003               | None               |
| sus-PDLIM5_0001             | hsa-PDLIM5_0001    |
| sus-AGL_0001                | hsa-AC096949_0001  |
| sus-ENSSSCG00000026041_0001 | None               |

3

4

5

1 **Supplemental table 6. Key reagents and resources.**

| <b>Chemicals</b>                              | <b>Source</b>            | <b>Cat. No</b> |
|-----------------------------------------------|--------------------------|----------------|
| B27 supplement                                | Gibco                    | 17504044       |
| B27 supplement minus insulin                  | Gibco                    | A1895601       |
| Bovine Serum Albumin (BSA)                    | Thermo Fisher Scientific | BP9706100      |
| CHIR99021                                     | BioGems                  | 2520691        |
| D-Luciferin                                   | Sigma-Aldrich            | L9504          |
| DMEM                                          | Corning                  | MT10013CV      |
| DPBS                                          | Gibco                    | 14190250       |
| Dimethyl sulfoxide                            | Sigma-Aldrich            | 67-68-5        |
| DAPI                                          | Invitrogen               | D1306          |
| High-Capacity RNA-to-cDNA™<br>Kit             | Applied Biosystems™      | 4387406        |
| iPS DF19-9-7T                                 | WiCells Inc              | FTDL-01        |
| IWR-1                                         | BioGems                  | 1128234        |
| KAPA SYBR FAST qPCR Kits                      | Roche                    | 07959486001    |
| Illumina Ribo-Zero Plus rRNA<br>Depletion Kit | Illumina Inc.            | 20037135       |
| LightCycler 480 SYBR Green I<br>Master        | Roche Inc                | 04887352001    |
| Lipofectamine™ RNAiMAX                        | Thermo Fisher Scientific | 13778-100      |
| Matrigel                                      | Thermo Fisher Scientific | CB356253       |
| mTeSR™ Plus kit                               | Stem Cell Technologies   | 100-0276       |

|                                                               |                          |            |
|---------------------------------------------------------------|--------------------------|------------|
| MicroRNA first-strand synthesis<br>and miRNA quantitation kit | Takara Bio USA           | 638316     |
| NEBNext® Ultra™ II Directional<br>RNA Library Prep Kit        | New England Biolabs      | E7760L     |
| Newborn Calf Serum, New<br>Zealand origin                     | Thermo Fisher Scientific | 16010159   |
| Propidium Iodide - 1.0 mg/mL<br>Solution in Water             | Thermo Fisher Scientific | P3566      |
| Qubit™ RNA High Sensitivity<br>(HS) Assay Kits                | Thermo Fisher Scientific | Q32852     |
| RPMI 1640                                                     | Gibco                    | 11875119   |
| RPMI 1640 with no glucose                                     | Gibco                    | 11879020   |
| RNeasy mini kit                                               | QIAGEN                   | 74104      |
| RIPA Lysis and Extraction Buffer                              | Thermo Fisher Scientific | 89901      |
| Silencer® Select Negative<br>Control #1 siRNA                 | Thermo Fisher Scientific | 4390843    |
| Sodium azide                                                  | Sigma Aldrich Inc.       | 26628-22-8 |
| Two-well Chamber Slide                                        | Thermo Fisher Scientific | 154852     |
| TNNT2 RNA Alexa Fluor 568<br>probe                            | Thermo Fisher Scientific | PF-210     |
| ViewRNA™ ISH Cell Assay Kit                                   | Thermo Fisher Scientific | QVC0001    |

---



1 **Supplemental table 7. Primary and secondary antibodies**

| <b>Chemicals</b>                        | <b>Dilutions</b> | <b>Source</b>      | <b>Cat. No</b> |
|-----------------------------------------|------------------|--------------------|----------------|
| Cardiac Troponin T                      | 1:100            | Abcam              | ab8295         |
| BD Pharmingen™                          | 1:50             | BD Biosciences     | 565744         |
| Alexa Fluor® 647                        |                  |                    |                |
| Mouse Anti-Cardiac Troponin T           |                  |                    |                |
| BrdU (5-bromo-2'-deoxyuridine)          | 1:100            | Abcam              | ab142567       |
| PH3                                     | 1:200            | Sigma Aldrich Inc. | 06-570         |
| Alexa Fluor® 488                        | 1:100            | JACKSON            | 712-545-150    |
| AffiniPure Donkey Anti-Rat IgG (H+L)    |                  | IMMUNORESEARCH     |                |
| Alexa Fluor® 488                        | 1:100            | JACKSON            | 711-545-152    |
| AffiniPure Donkey Anti-Rabbit IgG (H+L) |                  | IMMUNORESEARCH     |                |
| Alexa Fluor® 594                        | 1:100            | JACKSON            | 711-585-152    |
| AffiniPure Donkey Anti-Rabbit IgG (H+L) |                  | IMMUNORESEARCH     |                |
| Alexa Fluor® 594                        | 1:100            | JACKSON            | 715-585-150    |
| AffiniPure Donkey Anti-Mouse IgG (H+L)  |                  | IMMUNORESEARCH     |                |

2

1 **Supplemental table 8. Primer sequences for qRT-PCR based validation of**  
 2 **circRNA expression in pig hearts and human induced pluripotent stem cells-**  
 3 **derived cardiomyocytes**

| <b>CircRNA ID</b>      | <b>Primer sequences</b> |                                    |
|------------------------|-------------------------|------------------------------------|
| <i>sus-CDH13_0001</i>  | Forward                 | AGCATCAGACCATCAGTTTCAAG            |
|                        | Reverse                 | TGTGGCGGGATCATCCTTGT               |
| <i>sus-ABLIM1_0001</i> | Forward                 | AAGAATGAAGTAATGCT TTGAGAAAAGGAAAT  |
|                        | Reverse                 | ACATGATTCAGCAATCCCACT              |
| <i>sus-RNF13_0002</i>  | Forward                 | TTCAAAAAAGTATAATTTTGAAAATGCATCTCAG |
|                        | Reverse                 | ACCTTCAGCCGGAAGTCTAT               |
| <i>sus-CDC42_0001</i>  | Forward                 | GATACTGCAGGTCATCATCAAATTTG         |
|                        | Reverse                 | ATCGCCCACAACAACACACT               |
| <i>sus-KIF1B_0001</i>  | Forward                 | GCCAAGCCCGCTCTGTGTTG               |
|                        | Reverse                 | TGGATGCATTAGCTCCTCCATT             |
| <i>sus-MYOM1_0001</i>  | Forward                 | CGCAAAGCCCGAAACTTCAA               |
|                        | Reverse                 | GCGTCAAATCTACCCCAACAGG             |
| <i>sus-TBCD_0003</i>   | Forward                 | CTTCCCGACTCTCGGACGGC               |
|                        | Reverse                 | GGTGGCAGCATGGGGTAGAC               |
| <i>sus-PDLIM5_0001</i> | Forward                 | ATCTTGAAAGCAGCTAGGGATTGGG          |
|                        | Reverse                 | TCTGAGGTCCCAGGCATCAT               |
| <i>sus-AGL_0001</i>    | Forward                 | ATTCTTGGGCCTGTAGTTCTGG             |
|                        | Reverse                 | TAAGCATAGCACTGGCGTGT               |
| <i>sus-ENSSSCG</i>     | Forward                 | ACCATCAACCATTGTAGCTTAGT            |

|                          |         |                                     |
|--------------------------|---------|-------------------------------------|
| <i>0000026041_0001</i>   | Reverse | AGCCCTACTTACAACAGCCAG               |
| <i>GAPDH-pig</i>         | Forward | GTGAACGGATTTGGCCGCA                 |
|                          | Reverse | AAGGGGTCATTGATGGCGAC                |
| <i>hsa-ABLIM1_0001</i>   | Forward | AGAAACCACCTTCTCCAGCATG              |
|                          | Reverse | AGGCTCCCCACATTTATGGC                |
| <i>hsa-RNF13_0004</i>    | Forward | GTACATAAATTCAAGAAAGTATAACTTTGAAAATG |
|                          | Reverse | GTGGCCCCTTTAAACCTTCAG               |
| <i>hsa-KIF1B_0001</i>    | Forward | TGGTTCAAACCTTGTGGGGAGGAC            |
|                          | Reverse | TCCAAGGAAACAGGAACTTTTCGG            |
| <i>hsa-MYOM1_0001</i>    | Forward | CCAGAACCTCGTGTCACGTGAC              |
|                          | Reverse | CTCGGTTTCTTCTAACGTCCTGAG            |
| <i>hsa-AC096949_0001</i> | Forward | ATGTTTCATCTTGAGAGGTTTTAATAACTGC     |
|                          | Reverse | GTGGCTGGGATTCTCTGTT                 |
| <i>hsa-PDLIM5_0001</i>   | Forward | CAACGGCCAAACCAAGGAGCC               |
|                          | Reverse | CCTTGGACGCCAGTCTTCAGT               |
| <i>MME-human</i>         | Forward | GATCTGCTGAGGGGTCACG                 |
| <i>MME-human</i>         | Reverse | TGTACAAGGCTCAGTGGTGG                |
| <i>GAPDH-human</i>       | Forward | GGAGCGAGATCCCTCCAAAAT               |
|                          | Reverse | GGCTGTTGTCATACTTCTCATGG             |

---

1 **Supplemental table 9. Sequences of siRNAs for circRNA knockdown in human**  
 2 **induced pluripotent stem cells-derived cardiomyocytes**

| Genes                 |           | Sequences             | Concentration<br>(nM) |
|-----------------------|-----------|-----------------------|-----------------------|
| <i>hsa-</i>           | Sense     | CUACCAUCCCAAUUGCUUUtt | 80                    |
| <i>ABLIM1_0001</i>    | Antisense | AAAGCAAUUGGGAUGGUAGgt | 80                    |
| <i>hsa-</i>           | Sense     | AGAGUAUCACAGACGUGAAtt | 10                    |
| <i>RNF13_0004</i>     | Antisense | UUCACGUCUGUGAUACUCUtt | 10                    |
| <i>hsa-KIF1B_0001</i> | Sense     | AGACCGAAAGUUUCCUGUUtt | 10                    |
|                       | Antisense | AACAGGAAACUUUCGGUCUct | 10                    |
| <i>hsa-</i>           | Sense     | GGACGUUAGAAGAAACCGAtt | 80                    |
| <i>MYOM1_0001</i>     | Antisense | UCGGUUUCUUCUAACGUCctg | 80                    |
| <i>hsa-</i>           | Sense     | GGUAUUUUCUUCGUGCAAAtt | 80                    |
| <i>AC096949_0001</i>  | Antisense | UUUGCACGAAGAAAUAACCca | 80                    |
| <i>hsa-</i>           | Sense     | GAAUCUGAAGCCGAUAAUAtt | 40                    |
| <i>PDLIM5_0001</i>    | Antisense | UAUUAUCGGCUUCAGAUUctt | 40                    |

1 **Supplemental table 10. Sequences of siRNAs for miRNA knockdown and**  
 2 **overexpression in human induced pluripotent stem cells-derived cardiomyocytes**

| miRNAs                |       | Sequences (5'-3')       |
|-----------------------|-------|-------------------------|
| <i>hsa-miR-15a-3P</i> | siRNA | GAGGCAGCACAATATGGCCT    |
| <i>hsa-miR-140-5P</i> | siRNA | ACCATAGGGTAAAACCACT     |
| <i>hsa-miR-197-3P</i> | siRNA | CTGGGTGGAGAAGGTGGTGA    |
| <i>hsa-miR-215-3P</i> | siRNA | TGGCCTAAAGAAATGACAGA    |
| <i>hsa-miR-31-5P</i>  | siRNA | GCTATGCCAGCATCTTGCC     |
| <i>hsa-miR-128-3P</i> | siRNA | AAAGAGACCGGTTCACTGTG    |
| <i>hsa-miR-15a-3P</i> | Mimic | CAGGCCAUUUUGUGCUGCCUCA  |
| <i>hsa-miR-140-5P</i> | Mimic | CAGUGGUUUUACCCUAUGGUAG  |
| <i>hsa-miR-197-3P</i> | Mimic | UUCACCACCUUCUCCACCCAGC  |
| <i>hsa-miR-215-3P</i> | Mimic | UCUGUCAUUUCUUUAGGCCAAUA |
| <i>hsa-miR-31-5P</i>  | Mimic | AGGCAAGAUGCUGGCAUAGCU   |
| <i>hsa-miR-128-3P</i> | Mimic | UCACAGUGAACCGGUCUCUUU   |

1 **Supplemental table 11. Primer sequences for qRT-PCR based validation of miRNA**  
 2 **expression in human induced pluripotent stem cells-derived cardiomyocytes**

| CircRNA ID            | Primer sequences            |
|-----------------------|-----------------------------|
| <i>hsa-miR-31-5p</i>  | 5'AGGCAAGAUGCUGGCAUAGCU     |
| <i>hsa-miR-197-3p</i> | 5'UUCACCACCUUCUCCACCCAGC    |
| <i>hsa-miR-215-3p</i> | 5'UCUGUCAUUUCUUUAGGCCAAUA   |
| <i>hsa-miR-214-5p</i> | 5'UGCCUGUCUACACUUGCUGUGC    |
| <i>hsa-miR-105-3p</i> | 5'ACGGAUGUUUGAGCAUGUGCUA    |
| <i>hsa-miR-140-5p</i> | 5'CAGUGGUUUUACCCUAUGGUAG    |
| <i>hsa-miR-15a-3p</i> | 5'CAGGCCAUAUUGUGCUGCCUCA    |
| <i>hsa-miR-128-3p</i> | 5'UCACAGUGAACCGGUCUCUUU     |
| <i>U6</i>             | Forward CTCGCTTCGGCAGCACAT  |
|                       | Reverse TTTGCGTGTCATCCTTGCG |

3
